# Supplementary material for: Bismuth-doped manganese molybdenum bimetallic oxide nanorods as a highly efficient nitrogen reduction catalyst
Source: Royal Society of Chemistry journal article supplement (doi:10.1039/d4qm00502c), 2024-01-01
Supplement: d4qm00502c1.pdf [file d4qm00502c1.pdf]

## Supporting Information

### **Bismuth-doped manganese molybdenum bimetallic oxide nanorods as a highly efficient nitrogen reduction catalyst**

Huhu Yin<sup>a</sup>, Ziyang Song<sup>b</sup>, Xiuqing Xing<sup>c</sup>, Ling Miao<sup>b</sup>, Yaokang Lv<sup>d</sup>, Lihua Gan<sup>b,\*</sup>,  
Mingxian Liu<sup>b,\*</sup>, Wei Xiong<sup>a,\*</sup>

*<sup>a</sup> Key Laboratory of Novel Biomass-Based Environmental and Energy Materials in Petroleum and Chemical Industry, Key Laboratory of Green Chemical Engineering Process of Ministry of Education, Hubei Key Laboratory of Novel Reactor & Green Chemical Technology, School of Chemistry and Environmental Engineering, Wuhan Institute of Technology, Wuhan 430205, China*

*<sup>b</sup> Shanghai Key Lab of Chemical Assessment and Sustainability, School of Chemical Science and Engineering, Tongji University, Shanghai, 200092 P. R. China*

*<sup>c</sup> Chemistry Department, University of California, Davis, California 95616, United States*

*<sup>d</sup> College of Chemical Engineering, Zhejiang University of Technology, Hangzhou, 310014 P. R. China).*

---

\*Corresponding author

E-mail address: ganlh@tongji.edu.cn; liumx@tongji.edu.cn; xiongwei@wit.edu.cn

## 1. Sample characterization and electrochemical testing

Field emission scanning electron microscopy (FESEM) was used to measure the morphology of catalysts on a Zeiss Sigma 300 EDS instrument, with an acceleration voltage of 0.02 kV-30 kV. X-ray diffraction (XRD) with Cu K $\alpha$  Radiation LabX XRD-6000 X-ray diffractometer ( $\lambda_{1/4}=1.5406 \text{ \AA}$ ) was collected, and diffraction data was recorded at  $2\theta$  from 10 to 80°. Within the range, the scanning rate is 5°/min. X-ray photoelectron (XPS) spectroscopy using Al K $\alpha$  Thermo Scientific K-Alpha+ X-ray photoelectron spectrometer with source. Use high-resolution transmission electron microscopy (HRTEM, JEM-2100) under 200 kV operation to test the TEM images of the catalyst. Measure and record the UV-vis spectrum of the electrolyte using a UV-1800 UV spectrophotometer.

The electrochemical workstation (CS310M) is connected to an H-type sealed electrolytic cell containing a three electrode system, with 0.1 M Na<sub>2</sub>SO<sub>4</sub> as the electrolyte. The blank carbon cloth coated with catalyst material is used as the working electrode (WE), saturated Ag/AgCl as the reference electrode (RE), and the blank carbon cloth as the counter electrode (CE). All potentials were tested using a reversible hydrogen electrode as a reference. The formula is as follows:  $E_{\text{RHE}}(\text{V})=E_{\text{Ag/AgCl}}+0.197+0.059 \times \text{pH}$ . Before NRR measurement, soak the electrolyte in ultra-high purity N<sub>2</sub> (99.999%) for 30 minutes. Then, use ultra-high purity N<sub>2</sub> to blow the electrode plates throughout the entire electrolysis process.

Weigh 5 mg of synthesized manganese molybdate based catalyst and place it in a 1 mL centrifuge tube. Then, add 10  $\mu\text{L}$  of Nafion solution, 490  $\mu\text{L}$  of ethanol, and 500  $\mu\text{L}$  of deionized water to the centrifuge tube to form a mixed solution. Then, sonicate

the mixed solution for 60 minutes to form a uniform suspension. Next, apply the suspension evenly with a 20  $\mu\text{L}$  pipette to the working area of the treated strip carbon cloth 1 cm x 1 cm. Each time, take 20  $\mu\text{L}$  of the suspension and dry it in a 50  $^{\circ}\text{C}$  oven for 5 minutes. Then, take it out and continue the coating for a total of 5 times (a total of 100  $\mu\text{L}$ , with a catalyst mass of about 0.5 mg). After all coatings are completed, dry in a 50  $^{\circ}\text{C}$  oven for 8 hours to obtain a working electrode that can be used directly.

## 2. Measurement of ammonia

The concentration of synthetic ammonia in the experiment was determined by the indophenol blue method. Firstly, prepare a chromogenic agent solution, weigh 10 g of salicylic acid and 10 g of sodium citrate dihydrate, and dissolve them in 2 M NaOH solution to obtain chromogenic agent solution A; First prepare 1 M NaOH solution for later use, then measure 3.63 mL of NaClO and add it to a 100 mL volumetric flask. Further add 1 M NaOH solution to obtain reagent solution B; Add 0.2 g of nitroprusside to 20 mL of deionized water to obtain reagent solution C. Then take 2 mL of the tested electrolyte and sequentially add 2 mL of developer A, 1 mL of developer B, and 0.2 mL of developer C. Shake the above mixture well and let it stand at room temperature in the dark for 1 hour. Collect the UV visible absorption spectra of the mixed solution at a wavelength of approximately 653 nm. Using 0.1 M  $\text{Na}_2\text{SO}_4$  solution as the solvent, different concentrations of  $(\text{NH}_4)_2\text{SO}_4$  were added to obtain ammonia nitrogen working solutions of different concentrations. The standard curve for detecting ammonia using indophenol blue method was obtained through fitting:  $y = 0.239x + 0.0354$  ( $R^2 = 0.999$ ), and the  $\text{NH}_3$  concentration in the unknown sample was calculated. (Fig. S1a and S1b)

Measure each sample at least three times. The NH<sub>3</sub> yield and FE rate are calculated using the following formula:

$$\text{NH}_3 \text{ yield } (\mu\text{g h}^{-1} \text{ mg}^{-1}) = \frac{c_{\text{NH}_3} \times V}{m \times t} \quad (1)$$

$$\text{FE } (\%) = \frac{3 \times F \times c_{\text{NH}_3}}{17 \times Q} \times 100\% \quad (2)$$

Among them,  $c_{\text{NH}_3}$  ( $\mu\text{g mL}^{-1}$ ) is the measured concentration of NH<sub>3</sub> in aqueous solution,  $V$  (mL) is the volume of electrolyte,  $t$  (h) is the electroreduction reaction time,  $m$  (mg) is the effective weight of the catalyst on the working electrode,  $F$  is the Faraday constant ( $96500 \text{ C mol}^{-1}$ ), and  $Q$  is the applied electricity (C) during the reaction.

### 3. Determination of by-product hydrazine

Evaluate the concentration of hydrazine in the electrolyte using the Watt Chrisp method. Firstly, add 2.0 g of dimethylaminobenzaldehyde (p-C<sub>9</sub>H<sub>11</sub>NO) and 10 mL of concentrated hydrochloric acid to 100 mL of anhydrous ethanol to prepare the colorimetric reagent. Subsequently, take 5 mL of the tested electrolyte and 5 mL of the colorimetric reagent, shake the mixed solution evenly, and place it in a dark place, away from light, and let it stand for 20 minutes. Record the absorbance at a wavelength of 455 nm using a UV spectrometer. Using 0.1 M Na<sub>2</sub>SO<sub>4</sub> as a solvent, different concentrations of hydrazine hydrochloride were added to obtain hydrazine working solutions. Finally, the standard curve for detecting hydrazine by Watt Christian method was obtained through fitting:  $y = 0.981x + 0.211$  ( $R^2 = 0.999$ ), estimating the N<sub>2</sub>H<sub>4</sub> content produced after electrolysis. (Fig. S1c and S1d)

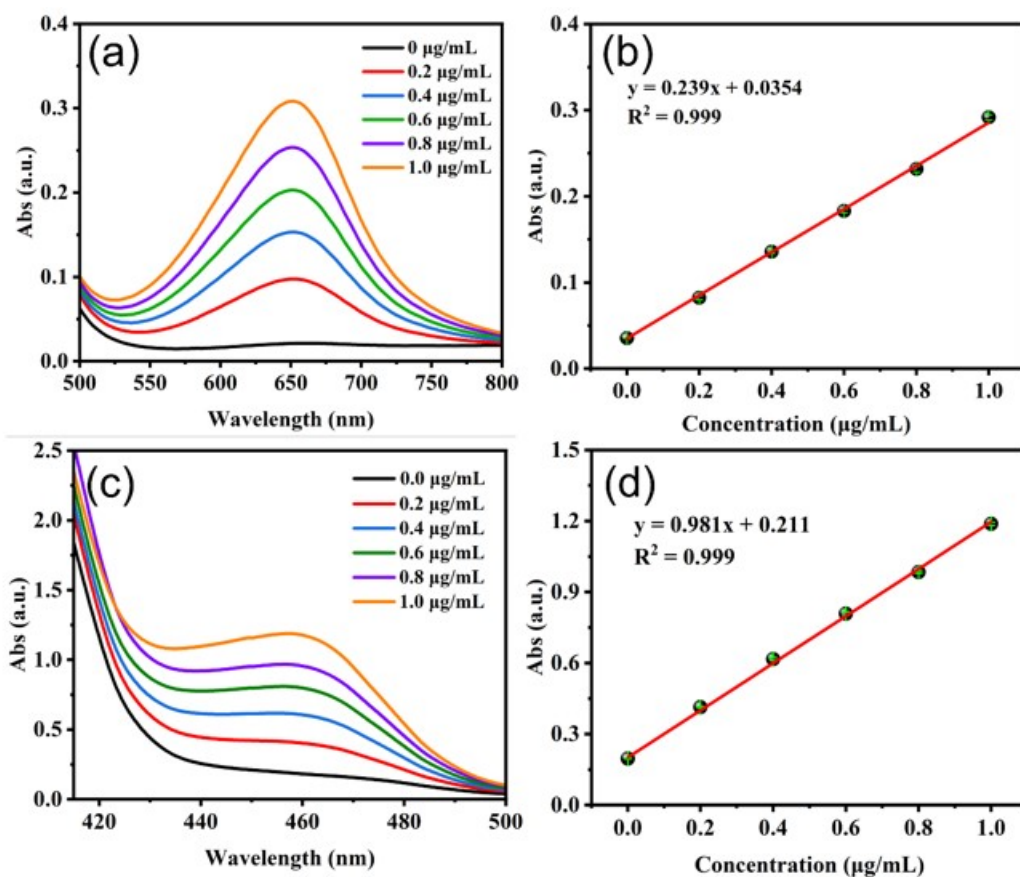

Fig. S1. (a) UV-vis absorption spectra obtained using indophenol blue method at different  $\text{NH}_3$  concentrations and (b) fitting curves. (c) Use Watt-Chrisp method to obtain UV-vis absorption spectra and (d) fitting curves at different  $\text{N}_2\text{H}_4$  concentrations.

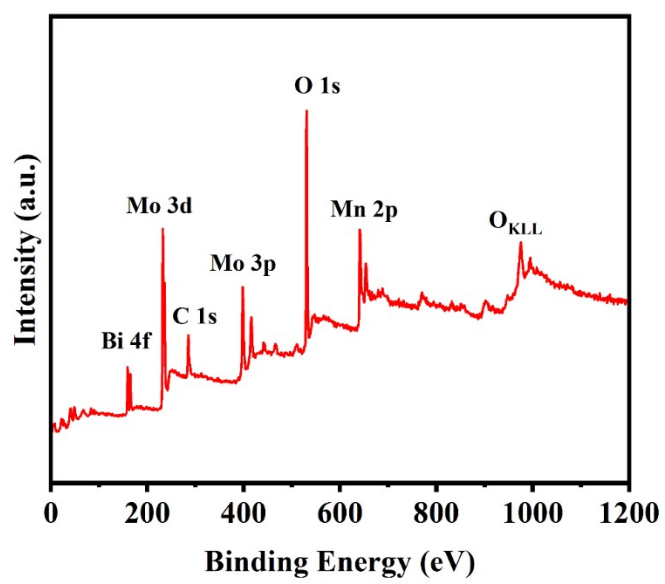

Fig. S2. XPS full spectrum of 6%Bi-MnMoO<sub>4</sub> after electrolysis.

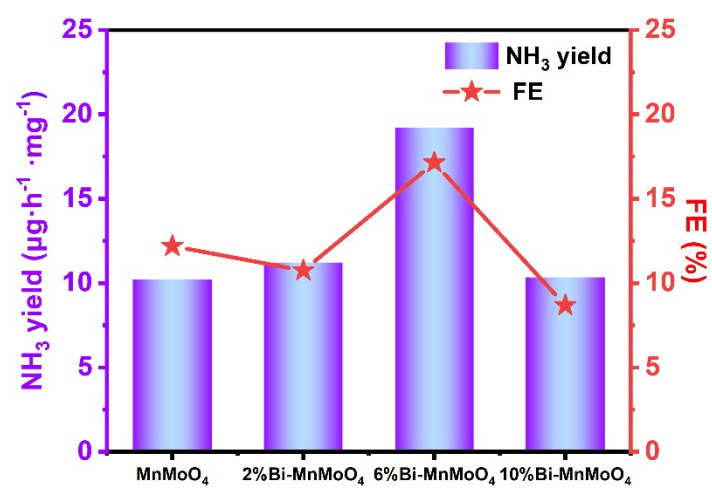

Fig. S3. Comparison of catalytic performance of four samples.

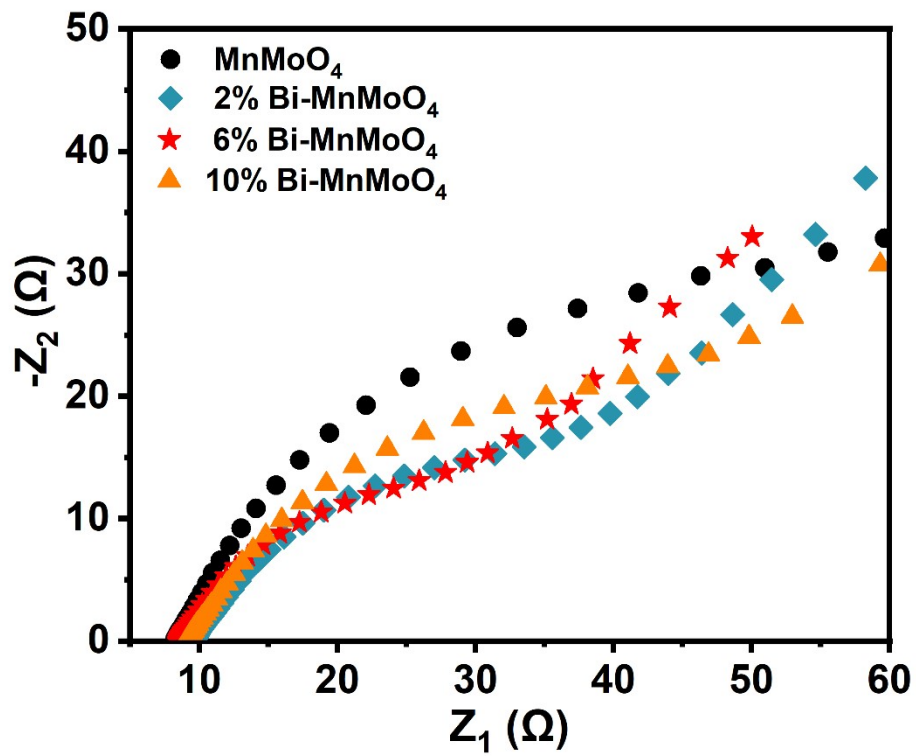

Fig. S4. EIS of MnMoO<sub>4</sub> and Bi-MnMoO<sub>4</sub> samples.



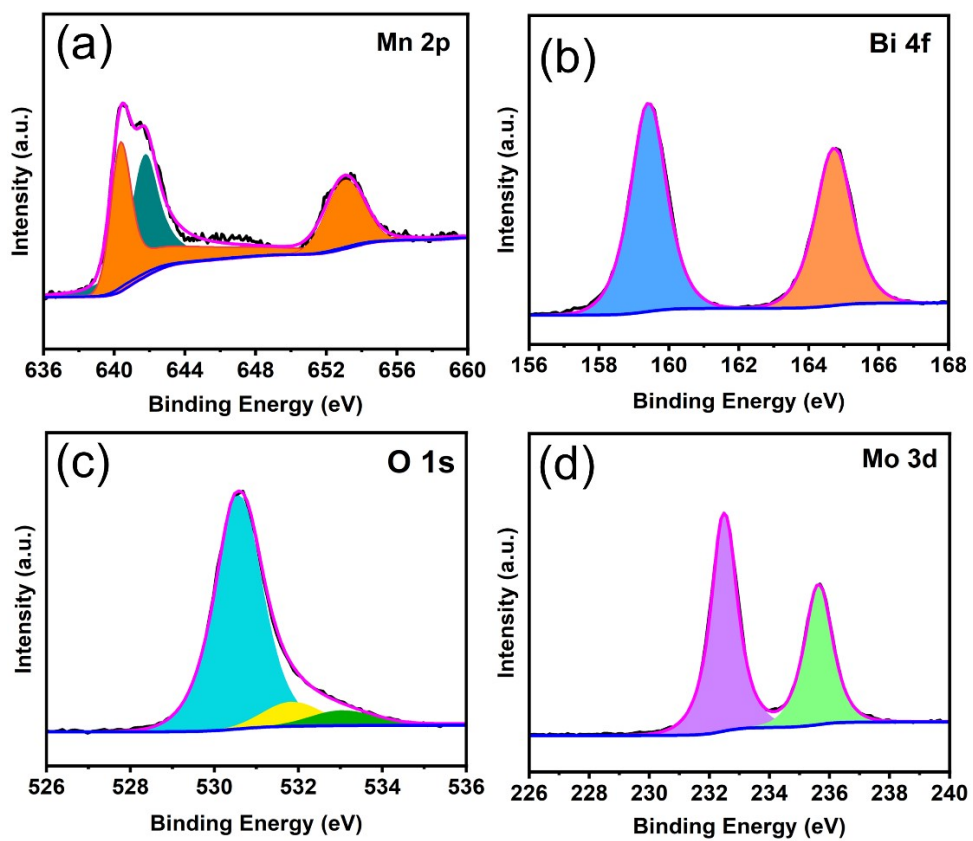

Fig. S5. XRD and XPS spectra of 6%Bi-MnMoO<sub>4</sub> after electrolysis.

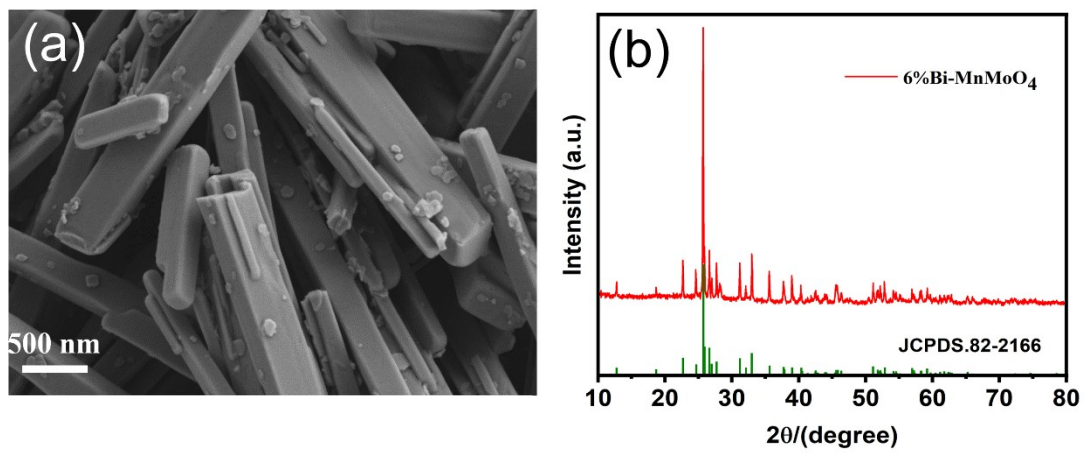

Fig. S6. (a) SEM image and (b) XRD spectra of 6%Bi-MnMoO<sub>4</sub> after electrolysis.
